# Supplementary figures and images for: The fungal sesquiterpenoid pyrenophoric acid B uses the plant ABA biosynthetic pathway to inhibit seed germination
Source: PubMed Central journal article supplement — J Exp Bot. 2019 Jun 28;70(19):5487–94. doi: 10.1093/jxb/erz306 (PMC6793445; doi:10.1093/jxb/erz306), 2019-06-28

Col-0 *aba1-101* *nced2,3* *nced3,5* *aba2-1* *aba2-11* *aoa3-2* *aba3-1* HAB1<sup>W385A</sup>

DMSO

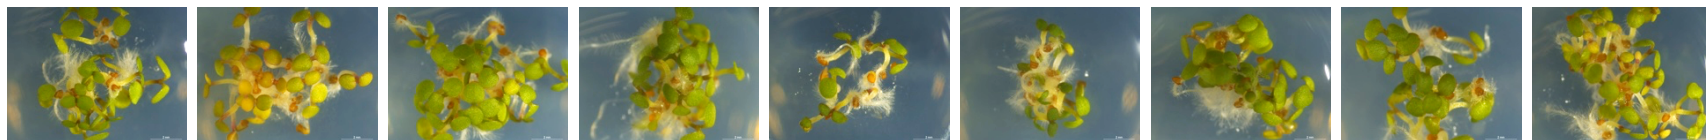

ABA

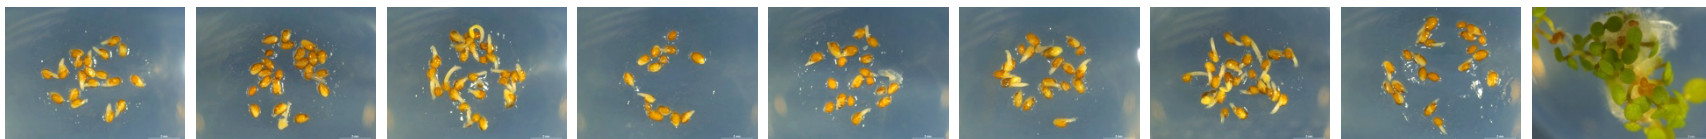

P-Acid B

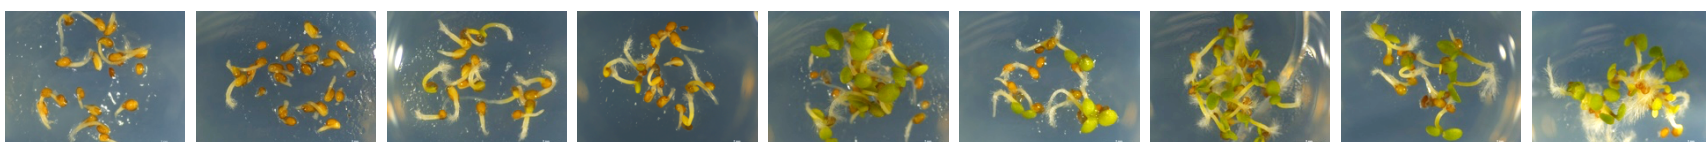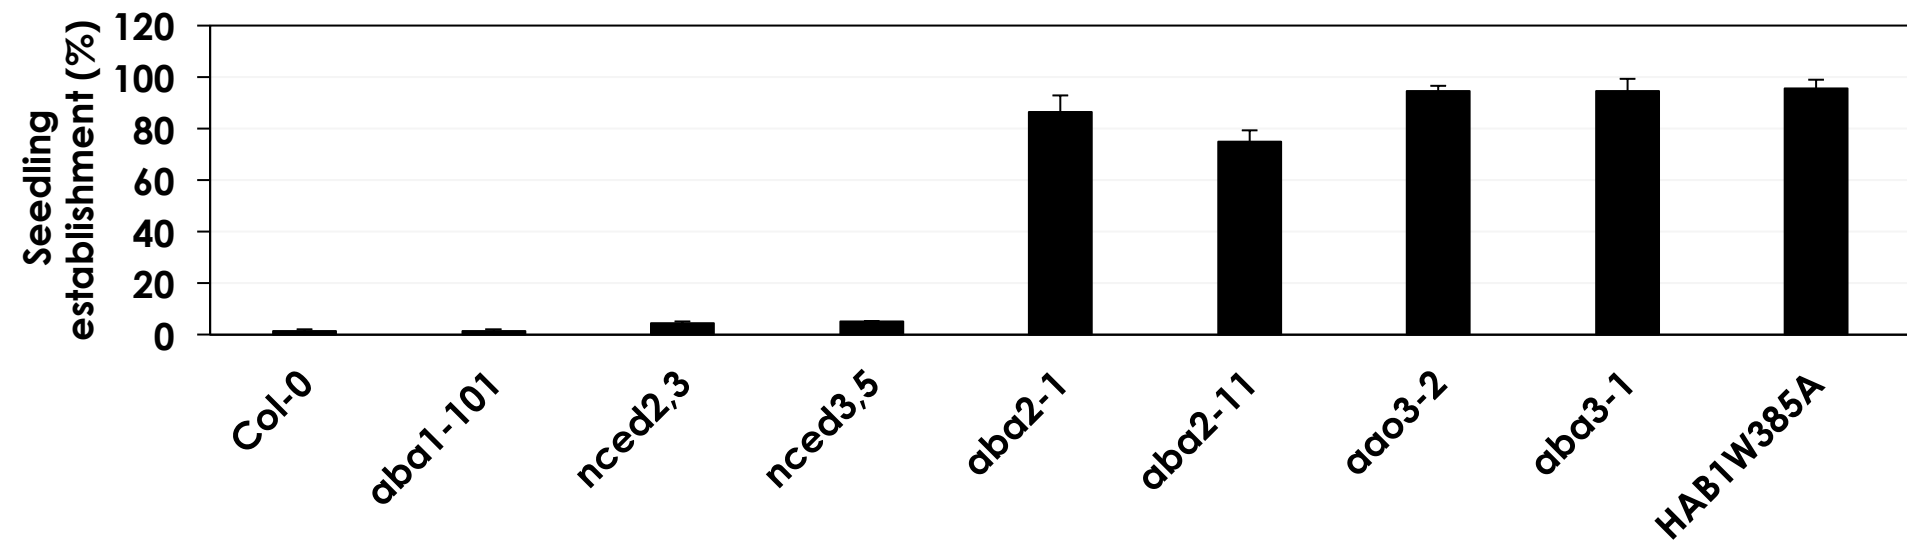

Supplement: erz306_suppl_supplementary_figure_s1.pdf [file erz306_suppl_supplementary_figure_s1.pdf]
